# Supplementary material for: Wnt/β-catenin controls follistatin signalling to regulate satellite cell myogenic potential
Source: PubMed Central journal article supplement (PMC4421991; doi:10.1186/s13395-015-0038-6), 2015-04-28
Supplement: 13395_2015_38_MOESM1_ESM.pdf [file 13395_2015_38_MOESM1_ESM.pdf]

**Table S1. Primer Sequences****Real Time RT-PCR**

---

|           |                       |
|-----------|-----------------------|
| Gja5_F    | CAGAGCCTGAAGAAGCCAAC  |
| Gja5_R    | GCAACCAGGCTGAATGGTAT  |
| Gcom_F    | TTGTGGACGTGACTTTGGAA  |
| Gcom_R    | ATTGGCTTCTTGCGATGACT  |
| Lrtm1_F   | ACCCTTGGATTTGTGACTGC  |
| Lrtm1_R   | AGAACCAGGCTGCTGGACTA  |
| Gdf6_F    | CAATGCCAGCTTTTTCCAGT  |
| Gdf6_R    | CCCACCAGCTCTTCTTTGTC  |
| Fst_F     | GCTCCTGCTGCTGCTACTCT  |
| Fst_R     | CCCGTTGAAAATCATCCACT  |
| Aldh1a2_F | CCATGACTTCCAGCGAGAT   |
| Aldh1a2_R | CAGGGAACACTCTCCCCTC   |
| Tgfb2_F   | CCGGAGGTGATTTCCATCTA  |
| Tgfb2_R   | GCGGACGATTCTGAAGTAGG  |
| Ccne2_F   | GGCATGTTACAGGAGGTTT   |
| Ccne2_R   | AATCCCAATGAGTTGAAGCA  |
| E2F1_F    | GACTCCTCGCAGATCGTCAT  |
| E2F1_R    | CAGCGAGGTACTGATGGTCA  |
| Mki67_F   | CAGACTTGCTCTGGCCTACC  |
| Mki67_R   | TGTCCACCAAAGGATACACG  |
| Cenpk_F   | CATTTTCTCTGCCTGAAGC   |
| Cenpk_R   | TATGGTGGCCAAAAGGAATC  |
| Pbk_F     | GTGGAAGTCCTTTTCCAGCA  |
| Pbk_R     | TTCATCCAATGGCAGAGAGA  |
| Aurkb_F   | AGGTCTGCAGGGAGAACTGA  |
| Aurkb_R   | ACGTCTCACTGTGGCTAGGG  |
| Axin2_F   | CGACCTCAAGTGCAAACCTCT |
| Axin2_R   | CTGGATAACTCGCTGTCGTT  |
| Myog_F    | GAAGTGAATGAGGCCTTCG   |
| Myog_R    | ACGATGGACGTAAGGGAGTG  |
| Mstn_F    | GACAGCAGTGATGGCTCTTT  |
| Mstn_R    | TAGGAGTCTTGACGGGTCTG  |
| Pax7_F    | CTGGATGAGGGCTCAGATGT  |
| Pax7_R    | GGTTAGCTCCTGCCTGCTTA  |
| Myh2_F    | CAGAACAGAGACGGCTTCAT  |
| Myh2_R    | AGTTTCTCCCAAACATCGT   |
| GAPDH_F   | TGTCCGTCGTGGATCTGAC   |
| GAPDH_R   | GGTCCTCAGTGTAGCCCAAG  |

**ChIP**

---

|               |                      |
|---------------|----------------------|
| GAPDH(-3kb)_F | TCCAGTGAGGACGGTATGAT |
| GAPDH(-3kb)_R | CATAAAGATGGGGCAAATG  |
| Fst(-30kb)_F  | CTTTGTGCCCGTTTGAAAAT |
| Fst(-30kb)_R  | GAAAGTGCCGCAAAGAAGAG |
