# Supplementary material for: Wnt/β-catenin controls follistatin signalling to regulate satellite cell myogenic potential
Source: PubMed Central journal article supplement (PMC4421991; doi:10.1186/s13395-015-0038-6), 2015-04-28
Supplement: 13395_2015_38_MOESM5_ESM.pdf [file 13395_2015_38_MOESM5_ESM.pdf]

**Table S2. Wnt3a Regulated Changes in Gene Expression**

| <b>Gene Symbol</b> | <b>Ensembl ID</b>   | <b>Fold Change</b> | <b>P-value</b> |
|--------------------|---------------------|--------------------|----------------|
| Gja5               | ENSMUSG000000057123 | 12.5375            | 7.34E-42       |
| Gcom1              | ENSMUSG000000041361 | 6.2437             | 5.06E-28       |
| Lrtm1              | ENSMUSG000000045776 | 6.0716             | 5.92E-36       |
| Slc16a4            | ENSMUSG000000027896 | 5.8579             | 3.77E-33       |
| Calca              | ENSMUSG000000030669 | 5.4211             | 1.46E-32       |
| Gdf6               | ENSMUSG000000051279 | 4.5604             | 1.43E-38       |
| Cd24a              | ENSMUSG000000047139 | 4.3579             | 2.63E-25       |
| Fst                | ENSMUSG000000021765 | 3.8138             | 8.97E-44       |
| Aldh1a2            | ENSMUSG000000013584 | 3.5783             | 4.57E-09       |
| Tgfb2              | ENSMUSG000000039239 | 3.5448             | 0.00E+00       |
| Bhlhe40            | ENSMUSG000000030103 | 3.4108             | 1.52E-27       |
| F5                 | ENSMUSG000000026579 | 3.1836             | 2.14E-09       |
| Cadps              | ENSMUSG000000054423 | 3.1473             | 1.14E-16       |
| Stmn2              | ENSMUSG000000027500 | 3.1203             | 5.27E-20       |
| Prokr1             | ENSMUSG000000049409 | 3.0486             | 4.90E-26       |
| Clstn2             | ENSMUSG000000032452 | 2.9915             | 5.85E-37       |
| Odz4               | ENSMUSG000000048078 | 2.9888             | 6.03E-26       |
| H60b               | ENSMUSG000000075297 | 2.8679             | 8.85E-11       |
| Edn1               | ENSMUSG000000021367 | 2.7636             | 5.30E-23       |
| Inhbb              | ENSMUSG000000037035 | 2.7634             | 4.98E-19       |
| Pfn2               | ENSMUSG000000027805 | 2.7620             | 3.84E-36       |
| Sema3b             | ENSMUSG000000057969 | 2.7464             | 0.00E+00       |
| Slc16a2            | ENSMUSG000000033965 | 2.7348             | 4.14E-24       |
| Sp7                | ENSMUSG000000060284 | 2.6793             | 7.61E-25       |
| Padi2              | ENSMUSG000000028927 | 2.6784             | 8.94E-34       |
| Axin2              | ENSMUSG000000000142 | 2.6729             | 8.47E-18       |
| Mir206             | ENSMUSG000000065559 | 2.6607             | 2.51E-35       |
| Bmp2               | ENSMUSG000000027358 | 2.6585             | 3.14E-17       |
| Frmpd1             | ENSMUSG000000035615 | 2.6449             | 0.00E+00       |
| Col25a1            | ENSMUSG000000058897 | 2.6381             | 1.59E-39       |
| Syt13              | ENSMUSG000000027220 | 2.6348             | 2.21E-34       |
| Pla1a              | ENSMUSG000000002847 | 2.6190             | 2.25E-26       |
| Thy1               | ENSMUSG000000032011 | 2.6052             | 5.27E-15       |
| Gpm6b              | ENSMUSG000000031342 | 2.5819             | 0.00E+00       |
| Il33               | ENSMUSG000000024810 | 2.5778             | 1.63E-26       |
| Fam107a            | ENSMUSG000000021750 | 2.5670             | 2.52E-26       |
| Igfbp2             | ENSMUSG000000039323 | 2.5480             | 1.70E-23       |
| Tmem86a            | ENSMUSG000000010307 | 2.5350             | 1.83E-28       |
| Acsl3              | ENSMUSG000000032883 | 2.5299             | 0.00E+00       |
| Sema3d             | ENSMUSG000000040254 | 2.5166             | 0.00E+00       |
| Ifi205             | ENSMUSG000000054203 | 2.4915             | 1.53E-14       |
| Cyp1b1             | ENSMUSG000000024087 | 2.4870             | 1.10E-13       |
| Sema5a             | ENSMUSG000000022231 | 2.4681             | 0.00E+00       |
| Tnfrsf19           | ENSMUSG000000060548 | 2.4339             | 0.00E+00       |
| Cdc42ep2           | ENSMUSG000000045664 | 2.4139             | 1.52E-30       |
| Srgap1             | ENSMUSG000000020121 | 2.4054             | 5.17E-27       |

|               |                    |        |          |
|---------------|--------------------|--------|----------|
| Adamtsl2      | ENSMUSG00000036040 | 2.3999 | 1.07E-23 |
| Ch25h         | ENSMUSG00000050370 | 2.3988 | 1.55E-16 |
| Arl4a         | ENSMUSG00000047446 | 2.3268 | 8.60E-35 |
| Mir133b       | ENSMUSG00000065480 | 2.3191 | 2.07E-36 |
| Tmem123       | ENSMUSG00000050912 | 2.2829 | 5.14E-45 |
| Nrcam         | ENSMUSG00000020598 | 2.2806 | 5.56E-32 |
| Pcp4l1        | ENSMUSG00000038370 | 2.2519 | 2.54E-11 |
| Rasl11b       | ENSMUSG00000049907 | 2.2502 | 7.85E-16 |
| Stc2          | ENSMUSG00000020303 | 2.2365 | 9.68E-26 |
| Rxfp1         | ENSMUSG00000034009 | 2.2284 | 0.00E+00 |
| Col8a1        | ENSMUSG00000068196 | 2.2132 | 2.79E-32 |
| Fam198b       | ENSMUSG00000027955 | 2.2092 | 1.08E-38 |
| Cdk5r1        | ENSMUSG00000048895 | 2.2071 | 1.99E-31 |
| Frem2         | ENSMUSG00000037016 | 2.2030 | 2.97E-38 |
| Grik1         | ENSMUSG00000022935 | 2.1871 | 4.65E-10 |
| Baiap2l1      | ENSMUSG00000038859 | 2.1769 | 0.00E+00 |
| Tbc1d12       | ENSMUSG00000048720 | 2.1705 | 4.69E-22 |
| Gdnf          | ENSMUSG00000022144 | 2.1651 | 1.30E-17 |
| Tspan9        | ENSMUSG00000030352 | 2.1586 | 2.56E-41 |
| Gadd45b       | ENSMUSG00000015312 | 2.1553 | 5.14E-30 |
| Adamts5       | ENSMUSG00000022894 | 2.1533 | 2.85E-34 |
| Dll1          | ENSMUSG00000014773 | 2.1360 | 7.68E-37 |
| Ube2e2        | ENSMUSG00000058317 | 2.1360 | 3.73E-36 |
| 2900062L11Rik | ENSMUSG00000048040 | 2.1217 | 6.25E-24 |
| Nav3          | ENSMUSG00000020181 | 2.1087 | 0.00E+00 |
| Slc7a7        | ENSMUSG00000000958 | 2.1046 | 1.11E-24 |
| Tgm2          | ENSMUSG00000037820 | 2.1044 | 2.56E-13 |
| P4ha2         | ENSMUSG00000018906 | 2.0864 | 4.44E-27 |
| Itgb1bp3      | ENSMUSG00000004939 | 2.0798 | 2.60E-32 |
| Nkd1          | ENSMUSG00000031661 | 2.0727 | 3.34E-19 |
| Fgf9          | ENSMUSG00000021974 | 2.0643 | 1.59E-33 |
| Al464131      | ENSMUSG00000046312 | 2.0608 | 3.48E-39 |
| Scn5a         | ENSMUSG00000032511 | 2.0582 | 9.14E-42 |
| Ror1          | ENSMUSG00000035305 | 2.0536 | 5.40E-16 |
| 5530400B01Rik | ENSMUSG00000043186 | 2.0516 | 8.36E-26 |
| Gprc5c        | ENSMUSG00000051043 | 2.0474 | 0.00E+00 |
| Gadd45g       | ENSMUSG00000021453 | 2.0467 | 7.13E-38 |
| Ache          | ENSMUSG00000023328 | 2.0366 | 1.07E-23 |
| Epha3         | ENSMUSG00000052504 | 2.0283 | 3.85E-17 |
| Lmcd1         | ENSMUSG00000057604 | 2.0279 | 7.66E-34 |
| Pak3          | ENSMUSG00000031284 | 2.0221 | 9.36E-38 |
| Rab40b        | ENSMUSG00000025170 | 2.0141 | 1.53E-23 |
| Slc10a7       | ENSMUSG00000031684 | 0.4996 | 3.81E-37 |
| Gm5465        | ENSMUSG00000075502 | 0.4994 | 4.84E-08 |
| 6720489N17Rik | ENSMUSG00000072066 | 0.4994 | 5.89E-09 |
| Slc8a1        | ENSMUSG00000054640 | 0.4962 | 1.01E-38 |
| Gpr137b-ps    | ENSMUSG00000075118 | 0.4961 | 9.46E-20 |
| Snai2         | ENSMUSG00000022676 | 0.4956 | 2.74E-40 |

|               |                    |        |          |
|---------------|--------------------|--------|----------|
| Ska1          | ENSMUSG00000036223 | 0.4956 | 3.73E-07 |
| Vrk2          | ENSMUSG00000064090 | 0.4952 | 5.63E-36 |
| Bard1         | ENSMUSG00000026196 | 0.4949 | 9.19E-10 |
| Slc27a3       | ENSMUSG00000027932 | 0.4941 | 2.09E-12 |
| D330028D13Rik | ENSMUSG00000047115 | 0.4939 | 6.38E-11 |
| Syce2         | ENSMUSG00000003824 | 0.4935 | 2.75E-24 |
| Mdc1          | ENSMUSG00000061607 | 0.4921 | 3.32E-25 |
| Avpr1a        | ENSMUSG00000020123 | 0.4908 | 2.10E-14 |
| Suv39h2       | ENSMUSG00000026646 | 0.4893 | 5.28E-17 |
| Hhip          | ENSMUSG00000064325 | 0.4892 | 6.24E-14 |
| Sh2d3c        | ENSMUSG00000059013 | 0.4889 | 3.74E-15 |
| E2f7          | ENSMUSG00000020185 | 0.4888 | 2.42E-19 |
| Zranb3        | ENSMUSG00000036086 | 0.4876 | 2.00E-17 |
| Prkcb         | ENSMUSG00000052889 | 0.4875 | 1.56E-26 |
| Pold1         | ENSMUSG00000038644 | 0.4869 | 3.12E-17 |
| Nid1          | ENSMUSG00000005397 | 0.4861 | 1.48E-42 |
| Syne2         | ENSMUSG00000063450 | 0.4858 | 2.55E-11 |
| Ndst3         | ENSMUSG00000027977 | 0.4857 | 7.34E-16 |
| Chaf1a        | ENSMUSG00000002835 | 0.4846 | 1.35E-18 |
| Efna5         | ENSMUSG00000048915 | 0.4841 | 1.80E-27 |
| Tmem48        | ENSMUSG00000028614 | 0.4839 | 0.00E+00 |
| Fads1         | ENSMUSG00000010663 | 0.4836 | 4.67E-46 |
| Cx3cl1        | ENSMUSG00000031778 | 0.4836 | 8.50E-22 |
| Apln          | ENSMUSG00000037010 | 0.4832 | 5.31E-10 |
| Topbp1        | ENSMUSG00000032555 | 0.4829 | 1.68E-35 |
| Rragb         | ENSMUSG00000041658 | 0.4816 | 7.64E-13 |
| 4632419I22Rik | ENSMUSG00000085208 | 0.4791 | 1.26E-25 |
| Rfc5          | ENSMUSG00000029363 | 0.4751 | 1.70E-13 |
| Vcam1         | ENSMUSG00000027962 | 0.4750 | 0.00E+00 |
| Msh2          | ENSMUSG00000024151 | 0.4744 | 1.24E-28 |
| Cyrr1         | ENSMUSG00000041134 | 0.4722 | 8.64E-14 |
| Prps2         | ENSMUSG00000025742 | 0.4720 | 1.61E-41 |
| Gm12181       | ENSMUSG00000082250 | 0.4717 | 3.92E-18 |
| Zfp125        | ENSMUSG00000069755 | 0.4712 | 3.74E-45 |
| Ckap2l        | ENSMUSG00000048327 | 0.4710 | 8.67E-28 |
| Dnajc9        | ENSMUSG00000021811 | 0.4696 | 6.35E-27 |
| Steap1        | ENSMUSG00000015652 | 0.4686 | 5.44E-25 |
| Fanca         | ENSMUSG00000032815 | 0.4672 | 6.48E-20 |
| Tmem171       | ENSMUSG00000052485 | 0.4667 | 9.59E-13 |
| Pla2g4a       | ENSMUSG00000056220 | 0.4655 | 0.00E+00 |
| Hn1l          | ENSMUSG00000024165 | 0.4654 | 7.74E-29 |
| BC048355      | ENSMUSG00000040658 | 0.4650 | 2.72E-21 |
| Bend6         | ENSMUSG00000042182 | 0.4620 | 6.34E-31 |
| 1700007K13Rik | ENSMUSG00000026831 | 0.4610 | 7.80E-16 |
| Dck           | ENSMUSG00000029366 | 0.4607 | 1.28E-20 |
| Myo1b         | ENSMUSG00000018417 | 0.4606 | 8.41E-34 |
| Mertk         | ENSMUSG00000014361 | 0.4605 | 1.35E-21 |
| 9030425E11Rik | ENSMUSG00000032024 | 0.4599 | 2.99E-16 |

|               |                    |        |          |
|---------------|--------------------|--------|----------|
| CntlIn        | ENSMUSG00000038070 | 0.4589 | 1.12E-28 |
| Msh6          | ENSMUSG00000005370 | 0.4569 | 5.17E-25 |
| Polq          | ENSMUSG00000034206 | 0.4561 | 2.42E-14 |
| Cdc7          | ENSMUSG00000029283 | 0.4553 | 2.74E-12 |
| Usp1          | ENSMUSG00000028560 | 0.4553 | 3.83E-19 |
| Srd5a1        | ENSMUSG00000021594 | 0.4539 | 4.84E-17 |
| Gsg2          | ENSMUSG00000050107 | 0.4536 | 4.24E-12 |
| Blm           | ENSMUSG00000030528 | 0.4528 | 5.95E-40 |
| Cit           | ENSMUSG00000029516 | 0.4525 | 1.26E-25 |
| Haus6         | ENSMUSG00000038047 | 0.4507 | 3.27E-38 |
| Prrg4         | ENSMUSG00000027171 | 0.4497 | 1.60E-32 |
| Pask          | ENSMUSG00000026274 | 0.4483 | 1.34E-16 |
| Rpp25         | ENSMUSG00000062309 | 0.4481 | 1.10E-05 |
| 4930534B04Rik | ENSMUSG00000061533 | 0.4467 | 3.74E-13 |
| Ptgs1         | ENSMUSG00000047250 | 0.4461 | 3.18E-32 |
| Mme           | ENSMUSG00000027820 | 0.4449 | 0.00E+00 |
| Dnmt1         | ENSMUSG00000004099 | 0.4435 | 0.00E+00 |
| Etaa1         | ENSMUSG00000016984 | 0.4422 | 2.54E-17 |
| Sfxn1         | ENSMUSG00000021474 | 0.4409 | 2.67E-34 |
| Ccne1         | ENSMUSG00000002068 | 0.4405 | 1.99E-42 |
| Dsc1          | ENSMUSG00000022422 | 0.4400 | 6.59E-07 |
| Cenpm         | ENSMUSG00000068101 | 0.4397 | 5.70E-14 |
| Cdc45         | ENSMUSG00000000028 | 0.4397 | 2.85E-27 |
| Gfra1         | ENSMUSG00000025089 | 0.4393 | 5.63E-25 |
| Donson        | ENSMUSG00000022960 | 0.4381 | 4.55E-19 |
| Mcm2          | ENSMUSG00000002870 | 0.4379 | 1.54E-36 |
| Mcm8          | ENSMUSG00000027353 | 0.4365 | 2.84E-28 |
| Cenpp         | ENSMUSG00000021391 | 0.4354 | 2.14E-15 |
| Oifr1372-ps1  | ENSMUSG00000084141 | 0.4351 | 1.92E-08 |
| Eps8          | ENSMUSG00000015766 | 0.4315 | 0.00E+00 |
| Nmnat2        | ENSMUSG00000042751 | 0.4311 | 9.30E-18 |
| Dmp1          | ENSMUSG00000029307 | 0.4301 | 6.53E-14 |
| Fat4          | ENSMUSG00000046743 | 0.4299 | 1.34E-18 |
| Cenpl         | ENSMUSG00000026708 | 0.4276 | 9.45E-16 |
| Atad5         | ENSMUSG00000017550 | 0.4274 | 7.09E-26 |
| Ccdc34        | ENSMUSG00000027160 | 0.4266 | 9.32E-26 |
| Nsl1          | ENSMUSG00000062510 | 0.4260 | 1.13E-11 |
| Rfc4          | ENSMUSG00000022881 | 0.4252 | 3.74E-44 |
| Vav3          | ENSMUSG00000033721 | 0.4248 | 2.77E-43 |
| Gas7          | ENSMUSG00000033066 | 0.4246 | 6.77E-14 |
| Fam19a5       | ENSMUSG00000054863 | 0.4217 | 1.04E-26 |
| Smc4          | ENSMUSG00000034349 | 0.4203 | 0.00E+00 |
| Spc24         | ENSMUSG00000074476 | 0.4184 | 1.54E-13 |
| 6720463M24Rik | ENSMUSG00000022070 | 0.4181 | 1.88E-21 |
| Trim59        | ENSMUSG00000034317 | 0.4172 | 1.05E-32 |
| Cxcl13        | ENSMUSG00000023078 | 0.4167 | 3.64E-12 |
| Orc1          | ENSMUSG00000028587 | 0.4146 | 4.76E-09 |
| Fads2         | ENSMUSG00000024665 | 0.4130 | 8.53E-31 |

|               |                    |        |          |
|---------------|--------------------|--------|----------|
| 4930422G04Rik | ENSMUSG00000051278 | 0.4129 | 1.79E-18 |
| Wdr76         | ENSMUSG00000027242 | 0.4125 | 3.14E-22 |
| Lonrf3        | ENSMUSG00000016239 | 0.4077 | 2.00E-10 |
| Mcm7          | ENSMUSG00000029730 | 0.4072 | 7.01E-24 |
| Ces2g         | ENSMUSG00000031877 | 0.4068 | 3.56E-09 |
| Prim2         | ENSMUSG00000026134 | 0.4063 | 1.01E-33 |
| Mcm4          | ENSMUSG00000022673 | 0.4063 | 2.02E-41 |
| Wee1          | ENSMUSG00000031016 | 0.4059 | 5.37E-34 |
| 2610021K21Rik | ENSMUSG00000021176 | 0.4059 | 7.24E-12 |
| Sass6         | ENSMUSG00000027959 | 0.4056 | 7.96E-39 |
| Troap         | ENSMUSG00000032783 | 0.4054 | 2.42E-18 |
| Mybl2         | ENSMUSG00000017861 | 0.4037 | 4.73E-10 |
| Gtse1         | ENSMUSG00000022385 | 0.4032 | 5.34E-33 |
| Abcb1b        | ENSMUSG00000028970 | 0.4019 | 3.15E-12 |
| Tacc3         | ENSMUSG00000037313 | 0.3993 | 1.27E-32 |
| Cdc6          | ENSMUSG00000017499 | 0.3983 | 6.43E-10 |
| Ppil5         | ENSMUSG00000034883 | 0.3978 | 2.70E-09 |
| Arhgap11a     | ENSMUSG00000041219 | 0.3933 | 4.53E-36 |
| Cdk1          | ENSMUSG00000019942 | 0.3933 | 6.80E-29 |
| Tipin         | ENSMUSG00000032397 | 0.3929 | 1.78E-35 |
| Cd200         | ENSMUSG00000022661 | 0.3914 | 4.76E-20 |
| Rgs5          | ENSMUSG00000026678 | 0.3875 | 4.67E-46 |
| Dut           | ENSMUSG00000027203 | 0.3866 | 5.17E-24 |
| Iqgap3        | ENSMUSG00000028068 | 0.3859 | 2.05E-17 |
| Sema6d        | ENSMUSG00000027200 | 0.3851 | 0.00E+00 |
| Ncapd2        | ENSMUSG00000038252 | 0.3840 | 6.06E-32 |
| Lmnb1         | ENSMUSG00000024590 | 0.3837 | 2.37E-26 |
| Ccdc18        | ENSMUSG00000056531 | 0.3836 | 8.69E-14 |
| Adcyap1r1     | ENSMUSG00000029778 | 0.3830 | 7.82E-30 |
| Rbl1          | ENSMUSG00000027641 | 0.3813 | 0.00E+00 |
| Ngf           | ENSMUSG00000027859 | 0.3806 | 2.31E-15 |
| C3ar1         | ENSMUSG00000040552 | 0.3790 | 6.68E-11 |
| Pde3b         | ENSMUSG00000030671 | 0.3790 | 6.74E-28 |
| Fam54a        | ENSMUSG00000019992 | 0.3789 | 1.58E-13 |
| Hist1h1a      | ENSMUSG00000049539 | 0.3781 | 4.59E-23 |
| Dhfr          | ENSMUSG00000021707 | 0.3776 | 1.35E-24 |
| BC030867      | ENSMUSG00000034773 | 0.3769 | 5.59E-12 |
| Espl1         | ENSMUSG00000058290 | 0.3753 | 3.02E-11 |
| Eme1          | ENSMUSG00000039055 | 0.3752 | 9.35E-14 |
| Cdca3         | ENSMUSG00000023505 | 0.3748 | 3.89E-19 |
| Zdhhc2        | ENSMUSG00000039470 | 0.3742 | 8.95E-20 |
| Mns1          | ENSMUSG00000032221 | 0.3732 | 4.73E-18 |
| Hist1h4f      | ENSMUSG00000069274 | 0.3708 | 3.89E-08 |
| Fanci         | ENSMUSG00000039187 | 0.3691 | 7.67E-22 |
| Mms22l        | ENSMUSG00000045751 | 0.3682 | 1.49E-31 |
| Slc5a3        | ENSMUSG00000089774 | 0.3681 | 3.75E-35 |
| Rad51ap1      | ENSMUSG00000030346 | 0.3667 | 1.89E-16 |
| Cenpw         | ENSMUSG00000075266 | 0.3662 | 1.61E-05 |

|               |                    |        |          |
|---------------|--------------------|--------|----------|
| Gas2l3        | ENSMUSG00000074802 | 0.3658 | 7.41E-35 |
| Fbxo48        | ENSMUSG00000044966 | 0.3655 | 3.74E-09 |
| Mad2l1        | ENSMUSG00000029910 | 0.3645 | 3.21E-36 |
| Fam83d        | ENSMUSG00000027654 | 0.3635 | 6.01E-30 |
| Ercc6l        | ENSMUSG00000051220 | 0.3619 | 1.99E-11 |
| Ckap2         | ENSMUSG00000037725 | 0.3611 | 8.99E-25 |
| 4632434l11Rik | ENSMUSG00000030641 | 0.3609 | 3.95E-34 |
| Hist2h2bb     | ENSMUSG00000050936 | 0.3591 | 4.44E-15 |
| Rad54b        | ENSMUSG00000078773 | 0.3572 | 2.51E-21 |
| Cdkn3         | ENSMUSG00000037628 | 0.3566 | 7.20E-16 |
| Pcsk1         | ENSMUSG00000021587 | 0.3561 | 2.55E-08 |
| Dbf4          | ENSMUSG00000002297 | 0.3548 | 1.74E-43 |
| Clspn         | ENSMUSG00000042489 | 0.3534 | 7.43E-12 |
| Arhgap19      | ENSMUSG00000025154 | 0.3528 | 8.19E-26 |
| Mcm5          | ENSMUSG00000005410 | 0.3525 | 7.31E-31 |
| Smc2          | ENSMUSG00000028312 | 0.3522 | 2.60E-29 |
| Ccnb2         | ENSMUSG00000032218 | 0.3521 | 4.29E-35 |
| Nr4a2         | ENSMUSG00000026826 | 0.3516 | 4.53E-36 |
| Rps6ka6       | ENSMUSG00000025665 | 0.3507 | 6.50E-13 |
| Incenp        | ENSMUSG00000024660 | 0.3505 | 4.63E-30 |
| Hist1h1b      | ENSMUSG00000058773 | 0.3504 | 3.76E-30 |
| Dna2          | ENSMUSG00000036875 | 0.3473 | 1.69E-20 |
| Lig1          | ENSMUSG00000056394 | 0.3468 | 4.36E-22 |
| Mcm10         | ENSMUSG00000026669 | 0.3462 | 4.39E-20 |
| Cdca7         | ENSMUSG00000055612 | 0.3459 | 4.96E-14 |
| Figl1         | ENSMUSG00000035455 | 0.3447 | 7.77E-18 |
| Rad54l        | ENSMUSG00000028702 | 0.3442 | 7.23E-19 |
| Cdca7l        | ENSMUSG00000021175 | 0.3439 | 3.18E-19 |
| Cldn1         | ENSMUSG00000022512 | 0.3439 | 9.43E-05 |
| Prc1          | ENSMUSG00000038943 | 0.3420 | 3.76E-33 |
| Gm8773        | ENSMUSG00000073234 | 0.3420 | 7.39E-10 |
| Ect2          | ENSMUSG00000027699 | 0.3413 | 2.37E-36 |
| Entpd1        | ENSMUSG00000048120 | 0.3399 | 3.28E-07 |
| Slc43a3       | ENSMUSG00000027074 | 0.3372 | 2.19E-33 |
| Foxm1         | ENSMUSG00000001517 | 0.3366 | 7.43E-20 |
| Cenpq         | ENSMUSG00000023919 | 0.3346 | 1.01E-29 |
| Aurka         | ENSMUSG00000027496 | 0.3339 | 4.44E-31 |
| Racgap1       | ENSMUSG00000023015 | 0.3324 | 7.18E-32 |
| Kcnh5         | ENSMUSG00000034402 | 0.3316 | 3.09E-12 |
| Gins1         | ENSMUSG00000027454 | 0.3312 | 2.63E-17 |
| Plk4          | ENSMUSG00000025758 | 0.3307 | 4.73E-41 |
| Cenpa         | ENSMUSG00000029177 | 0.3305 | 2.64E-24 |
| Pole2         | ENSMUSG00000020974 | 0.3292 | 6.12E-34 |
| Gzmd          | ENSMUSG00000059256 | 0.3285 | 2.13E-18 |
| Birc5         | ENSMUSG00000017716 | 0.3275 | 1.64E-18 |
| Mcm6          | ENSMUSG00000026355 | 0.3262 | 4.36E-39 |
| Mif1ip        | ENSMUSG00000031629 | 0.3240 | 8.55E-17 |
| Ndc80         | ENSMUSG00000024056 | 0.3238 | 5.72E-15 |

|               |                    |        |          |
|---------------|--------------------|--------|----------|
| Diap3         | ENSMUSG00000022021 | 0.3225 | 2.86E-20 |
| Cd34          | ENSMUSG00000016494 | 0.3206 | 1.57E-17 |
| Cenpf         | ENSMUSG00000026605 | 0.3204 | 4.46E-37 |
| Fancb         | ENSMUSG00000047757 | 0.3202 | 4.72E-21 |
| Cenpn         | ENSMUSG00000031756 | 0.3192 | 1.76E-33 |
| Chaf1b        | ENSMUSG00000022945 | 0.3170 | 6.82E-24 |
| Mcm3          | ENSMUSG00000041859 | 0.3169 | 1.45E-25 |
| Prr11         | ENSMUSG00000020493 | 0.3157 | 2.67E-32 |
| Tyms          | ENSMUSG00000025747 | 0.3155 | 5.74E-14 |
| Tpx2          | ENSMUSG00000027469 | 0.3144 | 2.91E-37 |
| Epha1         | ENSMUSG00000029859 | 0.3129 | 2.41E-19 |
| Fam64a        | ENSMUSG00000020808 | 0.3120 | 2.09E-14 |
| Pde1a         | ENSMUSG00000059173 | 0.3118 | 2.10E-28 |
| Tcf19         | ENSMUSG00000050410 | 0.3118 | 1.69E-16 |
| D2Ertd750e    | ENSMUSG00000027331 | 0.3100 | 1.27E-33 |
| Cdc20         | ENSMUSG00000006398 | 0.3092 | 5.71E-16 |
| Cdca2         | ENSMUSG00000048922 | 0.3089 | 2.12E-24 |
| Brca2         | ENSMUSG00000041147 | 0.3078 | 1.02E-13 |
| Uhrf1         | ENSMUSG00000001228 | 0.3077 | 3.41E-14 |
| Sgol2         | ENSMUSG00000026039 | 0.3077 | 2.65E-27 |
| Mybl1         | ENSMUSG00000025912 | 0.3076 | 1.02E-38 |
| Tk1           | ENSMUSG00000025574 | 0.3062 | 6.92E-07 |
| Plk1          | ENSMUSG00000030867 | 0.3059 | 3.64E-23 |
| Pola1         | ENSMUSG00000006678 | 0.3044 | 3.87E-30 |
| Ccna2         | ENSMUSG00000027715 | 0.3042 | 0.00E+00 |
| Hist1h2bb     | ENSMUSG00000075031 | 0.3025 | 3.58E-15 |
| Cenpi         | ENSMUSG00000031262 | 0.3024 | 3.81E-35 |
| Gm15697       | ENSMUSG00000081670 | 0.3021 | 3.63E-05 |
| Ccne2         | ENSMUSG00000028212 | 0.3018 | 9.52E-34 |
| Rgs4          | ENSMUSG00000038530 | 0.2989 | 2.42E-14 |
| C330027C09Rik | ENSMUSG00000033031 | 0.2988 | 0.00E+00 |
| Kif20a        | ENSMUSG00000003779 | 0.2986 | 0.00E+00 |
| Cdc25c        | ENSMUSG00000044201 | 0.2983 | 4.12E-16 |
| Kif22         | ENSMUSG00000030677 | 0.2982 | 2.00E-22 |
| Ncaph         | ENSMUSG00000034906 | 0.2972 | 7.40E-40 |
| Kif23         | ENSMUSG00000032254 | 0.2959 | 0.00E+00 |
| Slc14a1       | ENSMUSG00000059336 | 0.2951 | 3.58E-13 |
| Mki67         | ENSMUSG00000031004 | 0.2939 | 5.76E-42 |
| Aspm          | ENSMUSG00000033952 | 0.2925 | 2.66E-21 |
| Stil          | ENSMUSG00000028718 | 0.2923 | 3.93E-29 |
| Cdca5         | ENSMUSG00000024791 | 0.2922 | 1.89E-11 |
| Ccnf          | ENSMUSG00000072082 | 0.2920 | 2.14E-31 |
| Oip5          | ENSMUSG00000072980 | 0.2904 | 1.23E-16 |
| Gm12387       | ENSMUSG00000084220 | 0.2895 | 1.65E-11 |
| Dlgap5        | ENSMUSG00000037544 | 0.2891 | 1.59E-31 |
| Wdhd1         | ENSMUSG00000037572 | 0.2883 | 0.00E+00 |
| 4930547N16Rik | ENSMUSG00000035365 | 0.2877 | 1.49E-24 |
| Spag5         | ENSMUSG00000002055 | 0.2875 | 5.39E-20 |

|               |                    |        |          |
|---------------|--------------------|--------|----------|
| Atad2         | ENSMUSG00000022360 | 0.2875 | 1.38E-31 |
| Nek2          | ENSMUSG00000026622 | 0.2871 | 6.63E-20 |
| Bub1b         | ENSMUSG00000040084 | 0.2869 | 0.00E+00 |
| Brca1         | ENSMUSG00000017146 | 0.2860 | 1.20E-28 |
| Aurkb         | ENSMUSG00000020897 | 0.2848 | 5.20E-27 |
| Zwilch        | ENSMUSG00000032400 | 0.2834 | 2.16E-41 |
| Cdca8         | ENSMUSG00000028873 | 0.2834 | 6.75E-21 |
| Kntc1         | ENSMUSG00000029414 | 0.2833 | 0.00E+00 |
| Melk          | ENSMUSG00000035683 | 0.2831 | 8.14E-24 |
| Mastl         | ENSMUSG00000026779 | 0.2822 | 1.01E-41 |
| 5730590G19Rik | ENSMUSG00000046591 | 0.2801 | 1.23E-35 |
| Chek1         | ENSMUSG00000032113 | 0.2772 | 1.00E-30 |
| Nusap1        | ENSMUSG00000027306 | 0.2755 | 8.76E-36 |
| Brip1         | ENSMUSG00000034329 | 0.2752 | 1.35E-22 |
| Fancd2        | ENSMUSG00000034023 | 0.2750 | 2.66E-22 |
| Top2a         | ENSMUSG00000020914 | 0.2745 | 0.00E+00 |
| Hist1h2ab     | ENSMUSG00000061615 | 0.2720 | 1.10E-10 |
| Trip13        | ENSMUSG00000021569 | 0.2715 | 3.12E-22 |
| Kif11         | ENSMUSG00000012443 | 0.2710 | 0.00E+00 |
| Sgol1         | ENSMUSG00000023940 | 0.2686 | 3.42E-30 |
| Apcdd1        | ENSMUSG00000071847 | 0.2684 | 8.32E-15 |
| Dtl           | ENSMUSG00000037474 | 0.2684 | 8.25E-33 |
| Scn9a         | ENSMUSG00000075316 | 0.2674 | 2.06E-11 |
| Spc25         | ENSMUSG00000005233 | 0.2672 | 1.10E-27 |
| Prim1         | ENSMUSG00000025395 | 0.2659 | 1.47E-24 |
| Reln          | ENSMUSG00000042453 | 0.2630 | 0.00E+00 |
| Exo1          | ENSMUSG00000039748 | 0.2602 | 5.57E-16 |
| Kif18a        | ENSMUSG00000027115 | 0.2592 | 3.53E-25 |
| Gen1          | ENSMUSG00000051235 | 0.2579 | 1.16E-29 |
| Hmmr          | ENSMUSG00000020330 | 0.2570 | 0.00E+00 |
| Shcbp1        | ENSMUSG00000022322 | 0.2556 | 3.54E-25 |
| Hells         | ENSMUSG00000025001 | 0.2539 | 7.35E-33 |
| Kif20b        | ENSMUSG00000024795 | 0.2534 | 9.25E-24 |
| Kif18b        | ENSMUSG00000051378 | 0.2522 | 3.03E-24 |
| Fam111a       | ENSMUSG00000024691 | 0.2521 | 6.19E-31 |
| Pole          | ENSMUSG00000007080 | 0.2506 | 0.00E+00 |
| Sfn9          | ENSMUSG00000069793 | 0.2496 | 1.55E-13 |
| Kif4          | ENSMUSG00000034311 | 0.2487 | 1.50E-22 |
| F630043A04Rik | ENSMUSG00000021965 | 0.2474 | 2.15E-27 |
| Cenph         | ENSMUSG00000045273 | 0.2472 | 9.52E-17 |
| Ttk           | ENSMUSG00000038379 | 0.2457 | 1.89E-26 |
| Cenpe         | ENSMUSG00000045328 | 0.2456 | 0.00E+00 |
| Nuf2          | ENSMUSG00000026683 | 0.2447 | 2.79E-32 |
| Ncapg2        | ENSMUSG00000042029 | 0.2435 | 2.70E-29 |
| Kif15         | ENSMUSG00000036768 | 0.2425 | 2.15E-29 |
| Casc5         | ENSMUSG00000027326 | 0.2416 | 4.08E-29 |
| Kif2c         | ENSMUSG00000028678 | 0.2416 | 2.03E-32 |
| Neil3         | ENSMUSG00000039396 | 0.2394 | 4.09E-26 |



|            |                    |        |          |
|------------|--------------------|--------|----------|
| Cep55      | ENSMUSG00000024989 | 0.2377 | 1.66E-27 |
| AC087117.1 | ENSMUSG00000091747 | 0.2373 | 9.13E-26 |
| Rad51      | ENSMUSG00000027323 | 0.2373 | 2.29E-20 |
| Cenpk      | ENSMUSG00000021714 | 0.2328 | 5.40E-25 |
| Ncapg      | ENSMUSG00000015880 | 0.2262 | 0.00E+00 |
| Pbk        | ENSMUSG00000022033 | 0.2259 | 1.06E-13 |
| Fbxo5      | ENSMUSG00000019773 | 0.2199 | 2.15E-13 |
| Bub1       | ENSMUSG00000027379 | 0.2199 | 7.56E-34 |
| C79407     | ENSMUSG00000047534 | 0.2127 | 2.93E-35 |
| Esco2      | ENSMUSG00000022034 | 0.1982 | 1.07E-27 |
| Cxcl12     | ENSMUSG00000061353 | 0.1947 | 1.30E-30 |
